# Supplementary material
Source: Springer Nature journal article supplement (https://www.springermedizin.de/resource/supplementary/13075_2011_3593_MOESM1_ESM.pdf/9694870)

**Cathepsin K**

**Collagenase**

**N-Telopeptide**

**C-Telopeptide**

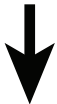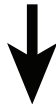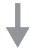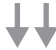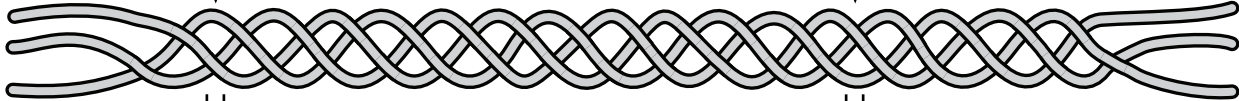

**GEAGKPG C2K**

**EGPP\*GPQG C2C**  
**GPP\*GPQG C1,2C**

Supplement: MOESM1 [file 9694870]
